# Supplementary material for: One-pot, ligand-free, room-temperature synthesis of Au/Pd/ZnO nanoclusters with ultra-low noble metal loading and synergistically improved photocatalytic performances
Source: Royal Society of Chemistry journal article supplement (doi:10.1039/d1ra02958d), 2021-01-01
Supplement: d1ra02958d1.pdf [file d1ra02958d1.pdf]

## Supporting Information

### **One-Pot, Ligand-Free, Room-Temperature Synthesis of Au/Pd/ZnO Nanoclusters with Ultra-Low Noble Metals Loading and Synergistically Improved Photocatalytic Performances**

Yunwei Wei,<sup>\*a</sup> Malik Zeeshan Shahid,<sup>b</sup> Shujuan Lyu<sup>a</sup> and Weiying Sun<sup>a</sup>

<sup>a</sup> Shandong Key Laboratory of Biophysics, Institute of Biophysics, Dezhou University, Dezhou 253023, Shandong, P. R. China, E-mail: sdweiyunwei@163.com.

<sup>b</sup> School of Chemistry and Chemical Engineering, University of Jinan, Jinan 250022, Shandong, P. R. China.

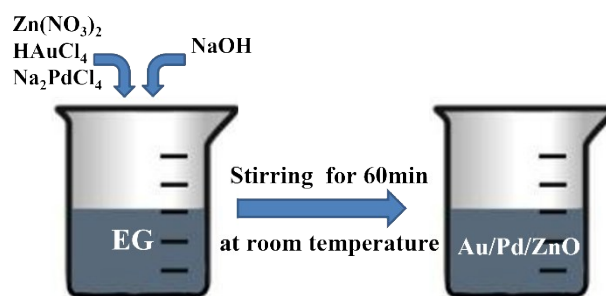

**Figure S1.** Schematic illustration for the synthesis of Au/Pd/ZnO nanoclusters.

| Sample    | Theoretical mass fraction of Au element(wt %) | Practical mass fraction of Au element(wt %) | Theoretical mass fraction of Pd element(wt %) | Practical mass fraction of Pd element(wt %) |
|-----------|-----------------------------------------------|---------------------------------------------|-----------------------------------------------|---------------------------------------------|
| Au/Pd/ZnO | 0.15 %                                        | 0.141 %                                     | 0.05 %                                        | 0.041 %                                     |
| Au/ZnO    | 0.20 %                                        | 0.189 %                                     |                                               |                                             |
| Pd/ZnO    |                                               |                                             | 0.20 %                                        | 0.158 %                                     |

**Table S1.** The Au/Pd/ZnO nanoclusters determined by inductively coupled plasma mass spectrometer.

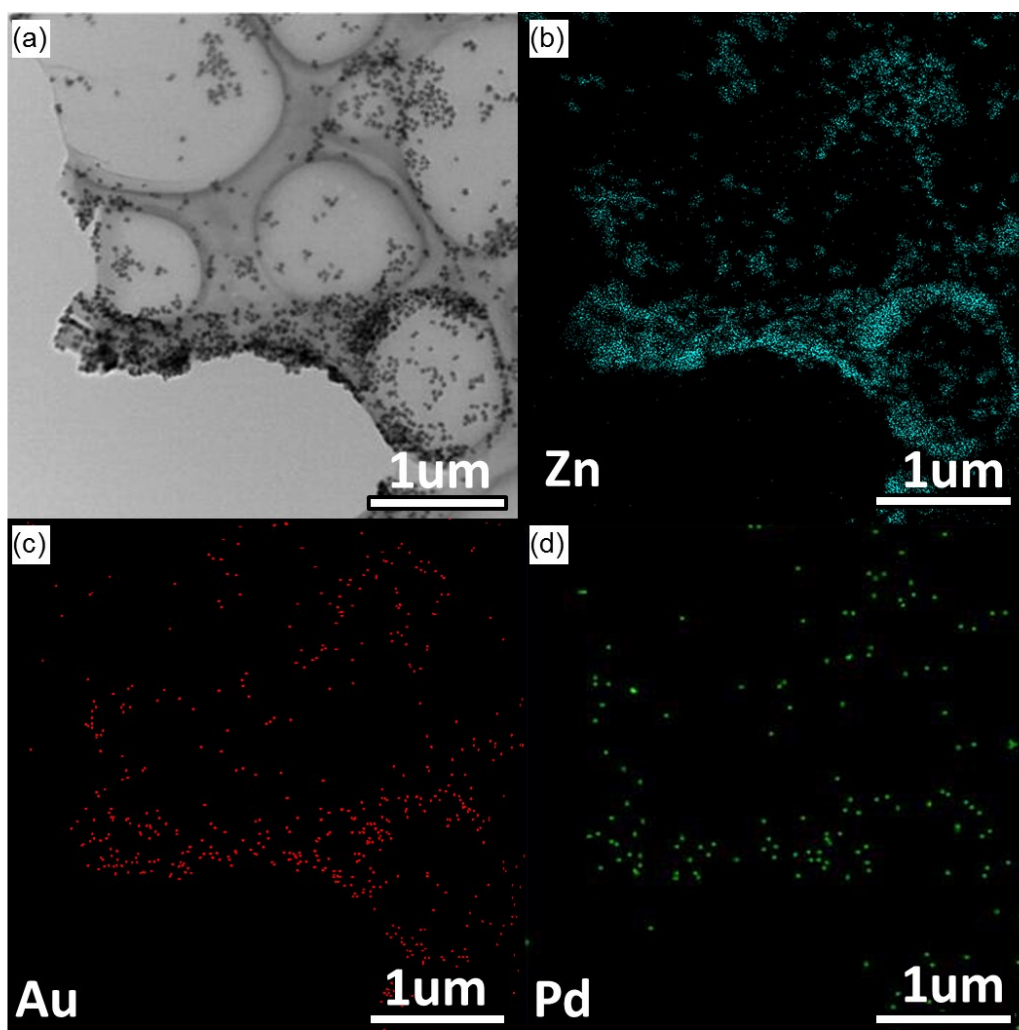

**Figure S2.** EDS mapping images for (b) Zn element, (c) Au element, (d) Pd element in a random selected-area shown in Figure (a).

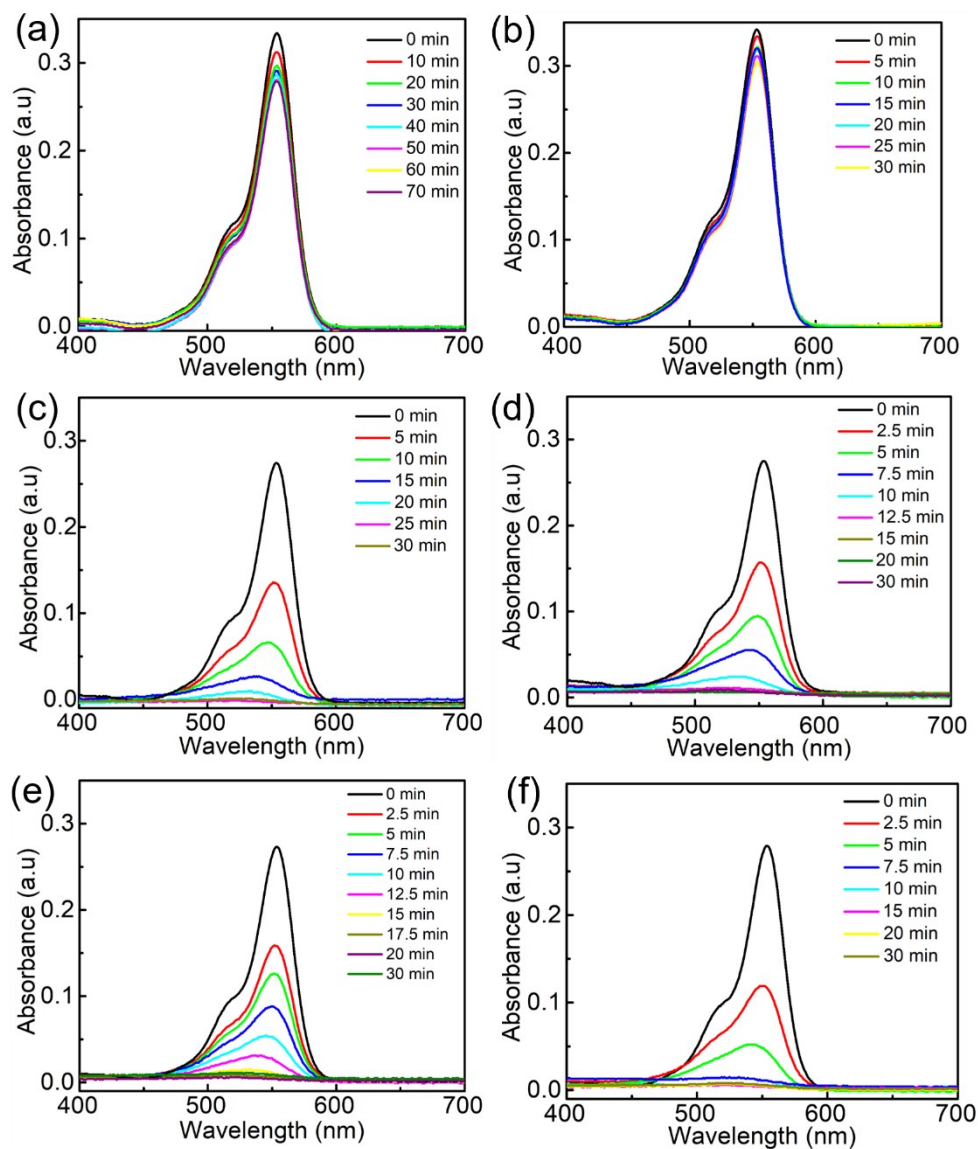

**Figure S3.** (a) UV-Vis spectra of RhB aqueous solution after the introduction of Au/Pd/ZnO nanoclusters in the dark condition, (b) UV-Vis spectral evolution of RhB aqueous solution only, UV-Vis spectral evolution of RhB aqueous solution in the presence of (c) ZnO, (d) Au/ZnO, (e) Pd/ZnO, and (f) Au/Pd/ZnO samples under the irradiation with a 300 W Xenon lamp at room temperature.

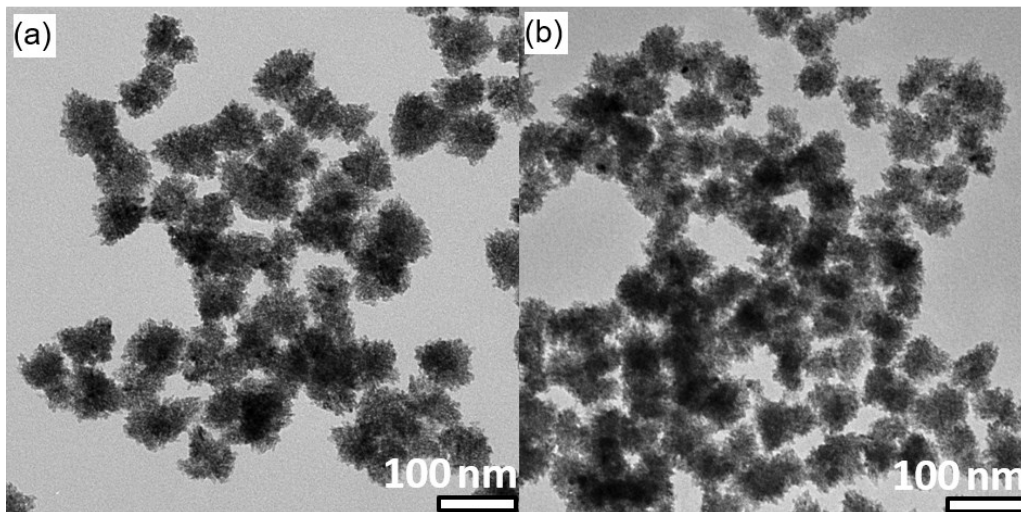

**Figure S4.** TEM images of (a) the as-synthesized Au/Pd/ZnO nanoclusters recovered after (a) 1 cycle and (b) 5 cycle photocatalytic reaction for organic dye RhB under the irradiation with Xenon lamp. Our results clearly showed that the size and morphology of Au/Pd/ZnO nanoclusters are well maintained after photocatalytic experiment, which ensure Au/Pd/ZnO nanoclusters always keep a high catalytic activity. All scale bars are 100 nm.

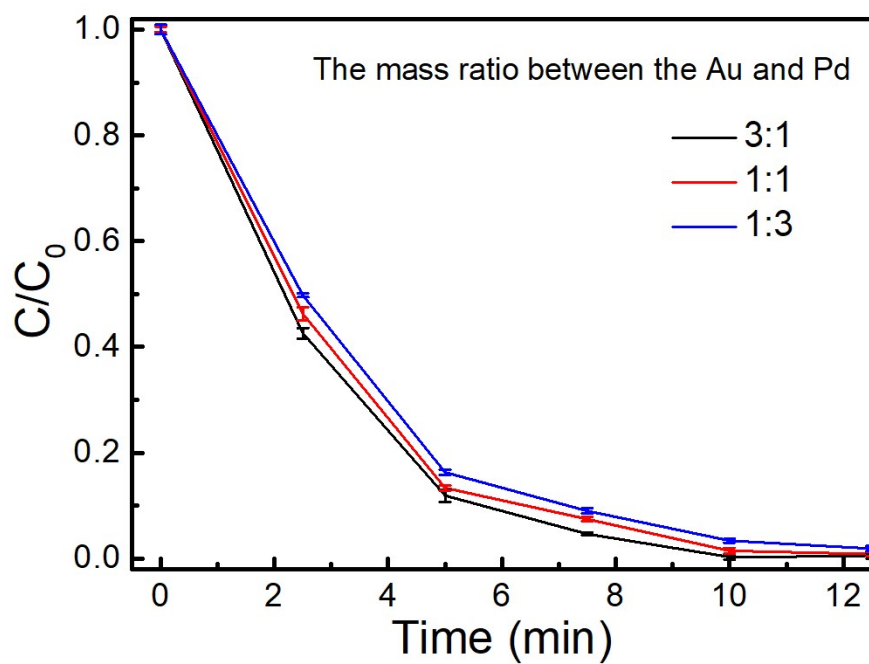

**Figure S5.** The photocatalytic performances ( $C/C_0$ ) of the as prepared Au/Pd/ZnO samples with different mass ratio between Au and Pd for degradation of RhB under simulated solar light irradiation.

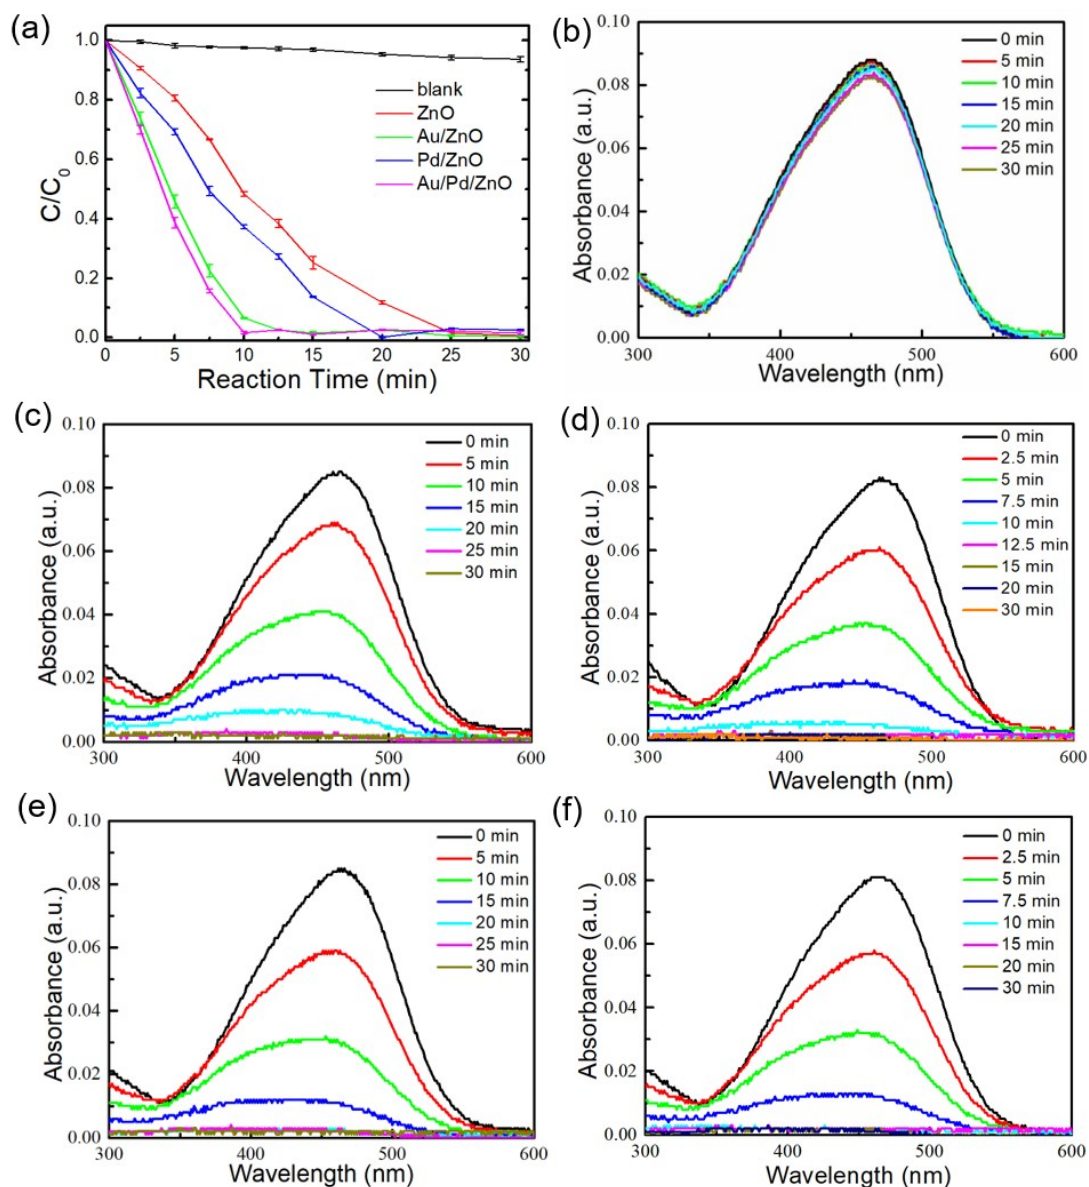

**Figure S6.** (a) The photocatalytic performances ( $C/C_0$ ) of the as prepared ZnO, Au/ZnO, Pd/ZnO, and Au/Pd/ZnO samples for degradation of MO under simulated solar light irradiation, (b) UV-Vis spectral evolution of MO aqueous solution only, UV-Vis spectral evolution of MO aqueous solution in the presence of (c) ZnO NPs, (d) Au/ZnO NPs, (e) Pd/ZnO NPs, (f) Au/Pd/ZnO samples under the irradiation with a 300 W Xenon lamp at room temperature.
